# Supplementary material for: Mining the Biosynthetic Potential for Specialized Metabolism of a Streptomyces Soil Community
Source: PubMed Central journal article supplement (PMC7277575; doi:10.3390/antibiotics9050271), 2020-05-23
Supplement: antibiotics-09-00271-s001.pdf [file antibiotics-09-00271-s001.pdf]

Supplementary data

**Mining the biosynthetic potential for specialized metabolism of a *Streptomyces* soil community**

Matthieu NICAULT<sup>1,2</sup>, Abdoul-Razak TIDJANI<sup>1</sup>, Anthony GAUTHIER<sup>1</sup>, Stéphane DUMARCAY<sup>3</sup>, Eric GELHAYE<sup>2</sup>, Cyril BONTEMPS<sup>1</sup>, Pierre LEBLOND<sup>1</sup>

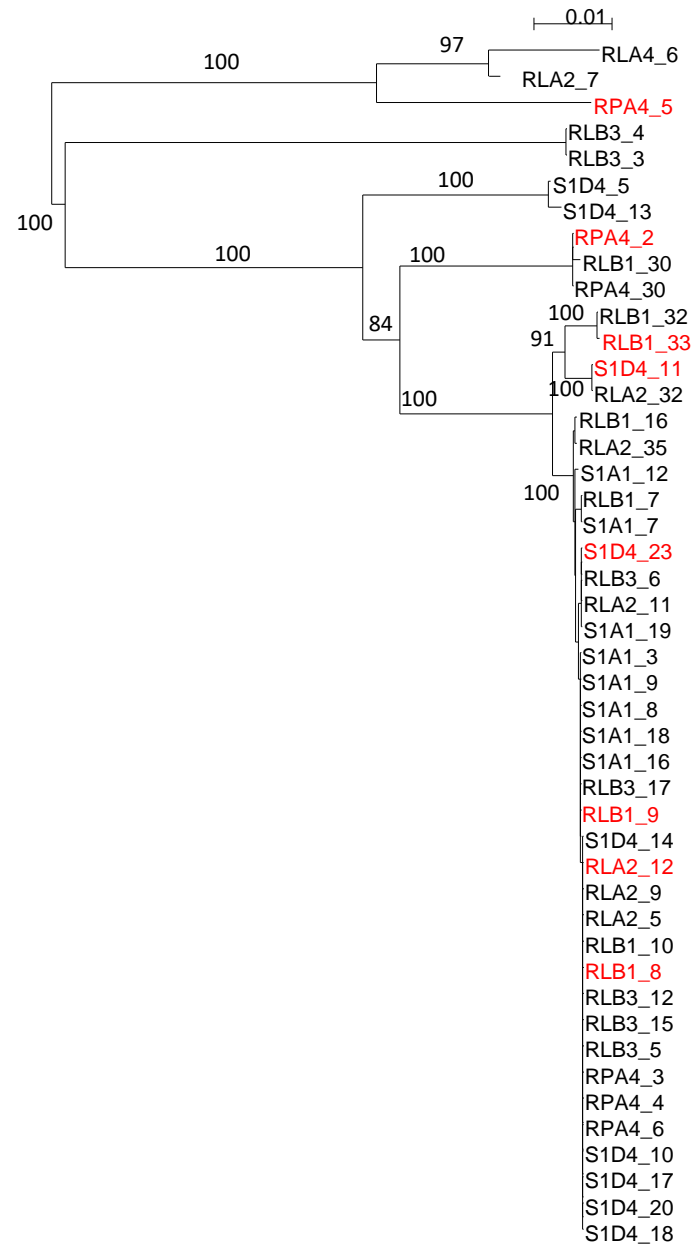

**Fig. S1. Phylogenetic multi locus sequence typing (MLSA) tree of isolated strains.**

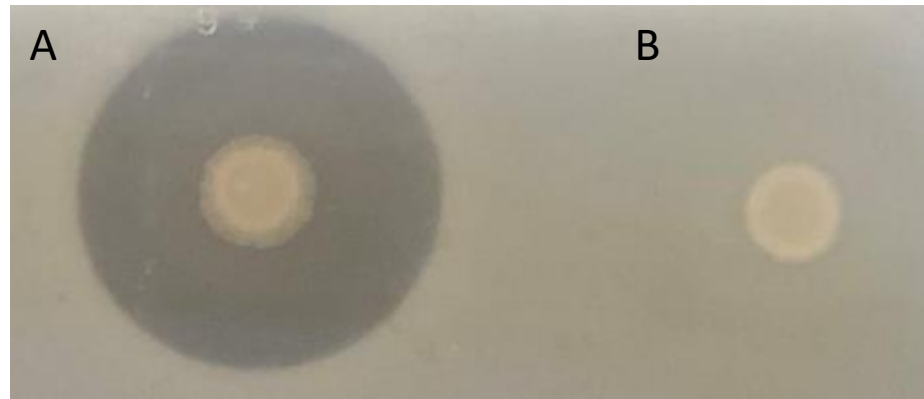

**Fig. S2. Illustration of a bioassay test.**

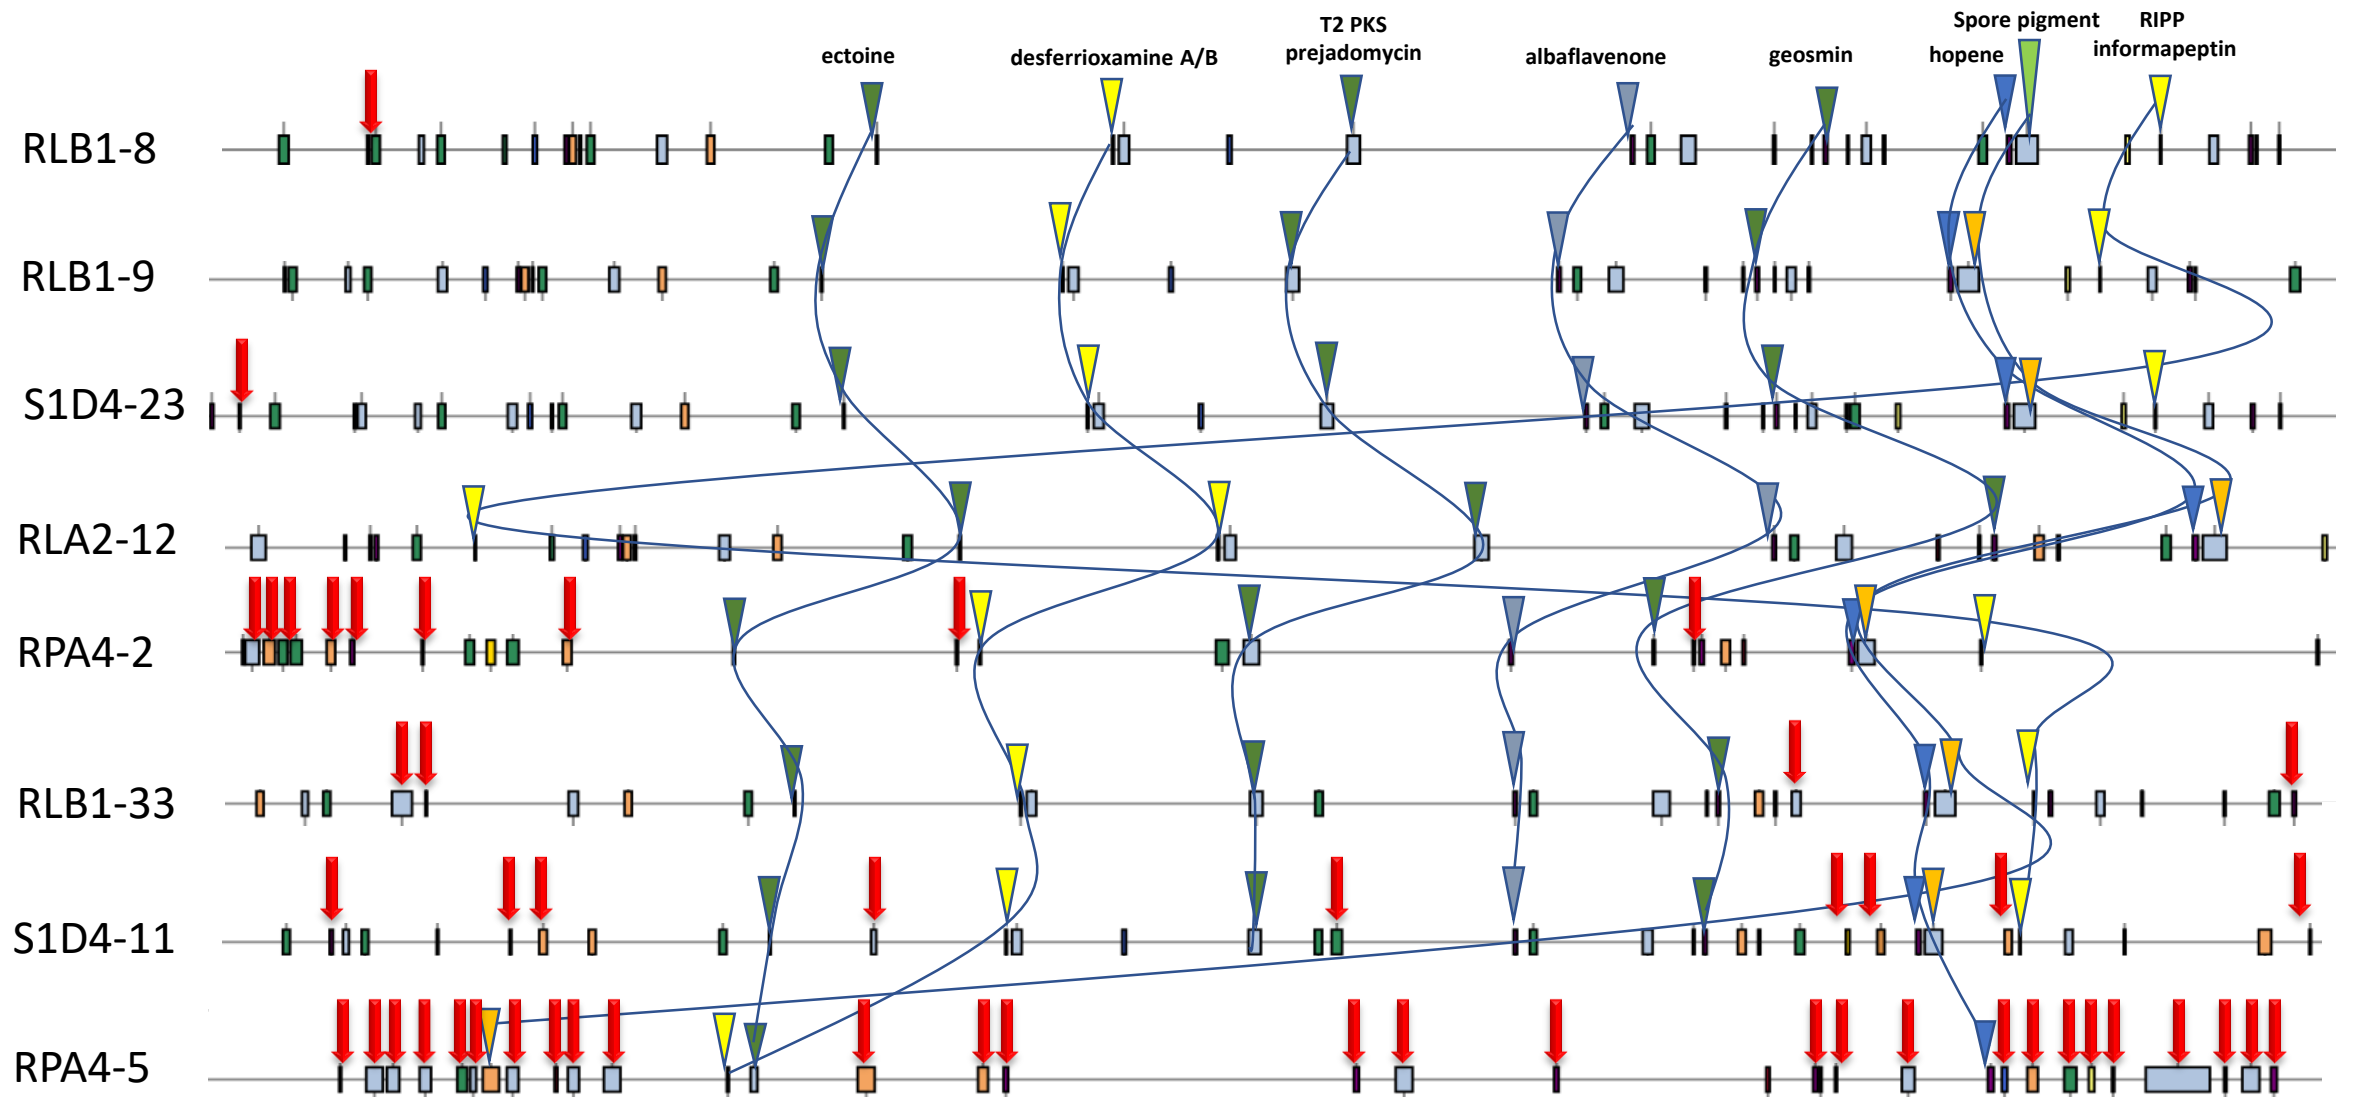

Fig S3. Schematization of the biosynthesis pathways along the chromosome of the strains studied.

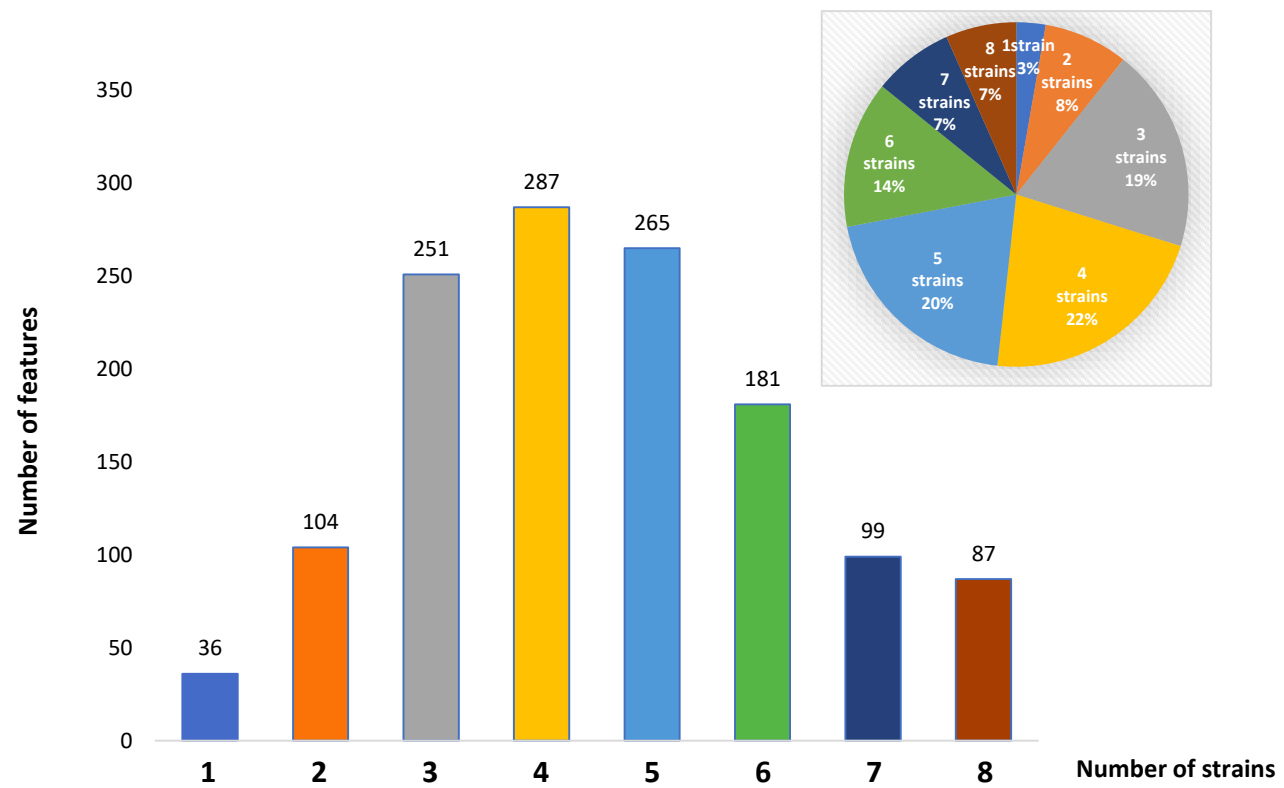

**Fig. S4. Distribution of GS/MS features in strains.**
